# Supplementary material for: Analogous Metabolic Decoupling in Pseudomonas putida and Comamonas testosteroni Implies Energetic Bypass to Facilitate Gluconeogenic Growth
Source: PubMed Central journal article supplement (PMC8669468; doi:10.1128/mbio.03259-21), 2021-12-14
Supplement: mbio.03259-21-st001.pdf [file mbio.03259-21-st001.pdf]

**Table S1.** Functional traits determined for species shown in phylogenetic tree (see Fig. 1a in the main text). KEGG annotations for the genomes of each species were examined for the genes needed for a functional pathway.

\*Used *C. thiooxydans* CNB-1 genome in KEGG database

\*\*Used *C. testosteroni* TK102 for KEGG identifiers and MetaCyc to confirm for *C. testosteroni* KF-1

| Species                                                         | Glycolytic EMP | Oxidative PP |        |        | ED pathway |        | C4-carboxylate transporters | Carbohydrate transport systems |                        |                        |                     | Glucose utilization   |
|-----------------------------------------------------------------|----------------|--------------|--------|--------|------------|--------|-----------------------------|--------------------------------|------------------------|------------------------|---------------------|-----------------------|
|                                                                 | PFK            | G6PD         | 6PGL   | 6PGD   | Edd        | Eda    | DctA                        | Glucose/mannose                | Ribose                 | Arabinose              | Fructose PTS system | Example in literature |
| <i>Zymomonas mobilis</i> ZM4                                    | NF             | K00036       | K01057 | NF     | K01690     | K01625 | NF                          | NF                             | NF                     | NF                     | NF                  | Positive (1)          |
| <i>Gluconobacter oxydans</i> 621H                               | NF             | K00036       | K07404 | K00033 | K01690     | K01625 | NF                          | NF                             | K10439, K10440, K10441 | NF                     | NF                  | Positive (2)          |
| <i>Sphingobium</i> sp. SYK-6                                    | K16370         | K00036       | NF     | NF     | K01690     | K01625 | K11103                      | NF                             | NF                     | NF                     | NF                  | Negative (3)          |
| <i>Rhodobacter sphaeroides</i> ATCC 17029                       | K16370         | K00036       | K01057 | NF     | K01690     | K01625 | K11103                      | K10112                         | K10439, K10440, K10441 | NF                     | Present             | Positive (4)          |
| <i>Comamonas thiooxydans</i> S23 *                              | K21071         | NF           | NF     | NF     | K01690     | K01625 | K11103                      | NF                             | NF                     | NF                     | NF                  | NF                    |
| <i>Comamonas testosteroni</i> KF-1 **                           | K21071         | NF           | NF     | NF     | K01690     | K01625 | K11103                      | NF                             | NF                     | NF                     | NF                  | Negative (this study) |
| <i>Comamonas serinivorans</i> SP-35                             | K21071         | NF           | NF     | NF     | NF         | NF     | NF                          | NF                             | NF                     | NF                     | NF                  | Negative (5)          |
| <i>Comamonas kerstersii</i> J29                                 | K21071         | NF           | NF     | NF     | NF         | NF     | K11103                      | NF                             | K10439, K10440, K10441 | NF                     | NF                  | NF                    |
| <i>Delftia acidovorans</i> SPH-1                                | NF             | K00036       | K07404 | NF     | K01690     | K01625 | K11103                      | NF                             | K10439, K10440, K10441 | NF                     | NF                  | Negative (6)          |
| <i>Cupriavidus necator</i> H16 ( <i>Ralstonia eutropha</i> H16) | NF             | K00036       | K01057 | NF     | K01690     | K01625 | K11103                      | NF                             | K10439, K10440, K10441 | NF                     | NF                  | Negative (7)          |
| <i>Pseudomonas fluorescens</i> F113                             | NF             | K00036       | K01057 | K00033 | K01690     | K01625 | K11103                      | K17315, K17316, K17317, K10112 | K10439, K10440, K10441 | K10537, K10538, K10539 | K02770, K00882      | Positive (8)          |
| <i>Pseudomonas alkylphenolica</i> KL28                          | NF             | K00036       | K01057 | K00033 | K01690     | K01625 | K11103                      | K17315, K17316, K17317, K10112 | K10439, K10440, K10441 | NF                     | K02770, K00882      | Positive (9)          |
| <i>Pseudomonas protegens</i> Pf-5                               | NF             | K00036       | K01057 | K00033 | K01690     | K01625 | K11103                      | K17315, K17316, K17317, K10112 | K10439, K10440, K10441 | NF                     | K02770, K00882      | Positive (10)         |
| <i>Pseudomonas putida</i> KT2440                                | NF             | K00036       | K01057 | K00033 | K01690     | K01625 | K11103                      | K17315, K17316, K17317, K10112 | K10439, K10440, K10441 | NF                     | K02770, K00882      | Positive (11)         |
| <i>Escherichia coli</i> K12 MG1655                              | K16370         | K00036       | K07404 | K00033 | K01690     | K01625 | K11103                      | NF                             | K10439, K10440, K10441 | K10537, K10538, K10539 | K02770, K00882      | Positive (12)         |
| <i>Acinetobacter baylyi</i> ADP1                                | NF             | NF           | NF     | NF     | K01690     | K01625 | K11103                      | NF                             | NF                     | NF                     | K02770, K00882      | Positive (13)         |

## References

1. T. B. Jacobson, *et al.*,  $^2\text{H}$  and  $^{13}\text{C}$  metabolic flux analysis elucidates in vivo thermodynamics of the ED pathway in *Zymomonas mobilis*. *Metab. Eng.* **54**, 301–316 (2019).
2. T. Hanke, *et al.*, Combined fluxomics and transcriptomics analysis of glucose catabolism via a partially cyclic pentose phosphate pathway in *Gluconobacter oxydans* 621H. *Appl. Environ. Microbiol.* **79**, 2336–2348 (2013).
3. M. Varman, *et al.*, Decoding how a soil bacterium extracts building blocks and metabolic energy from ligninolysis provides road map for lignin valorization. *Proc. Natl. Acad. Sci.* **40**, E5802–E5811 (2016).
4. E. Orsi, *et al.*, Metabolic flux ratio analysis by parallel  $^{13}\text{C}$  labeling of isoprenoid biosynthesis in *Rhodobacter sphaeroides*. *Metab. Eng.* **57**, 228–238 (2020).
5. D. Zhu, C. Xie, Y. Huang, J. Sun, W. Zhang, Description of *Comamonas serinivorans* sp. nov., isolated from wheat straw compost. *Int. J. Syst. Evol. Microbiol.* **64**, 4141–4146 (2014).
6. R. Shetty, *et al.*, Complete genome sequence of the phenanthrene-degrading soil bacterium *Delftia acidovorans* Cs1-4. *Stand. Genomic Sci.* **10**, 55 (2015).
7. S. Sichert, S. Hetzler, D. Broker, A. Steinbuchel, Extension of the Substrate Utilization Range of *Ralstonia eutropha* Strain H16 by Metabolic Engineering To Include Mannose and Glucose. *Appl. Environ. Microbiol.* **77**, 1325–1334 (2011).
8. O. Rice, S. H. Miller, J. P. Morrissey, F. O’Gara, Exploitation of glucose catabolic gene fusions to investigate in situ expression during *Pseudomonas*-plant interactions. *Biol. Fertil. Soils* **48**, 235–238 (2012).
9. M. Mulet, *et al.*, *Pseudomonas alkylphenolica* sp. nov., a bacterial species able to form special aerial structures when grown on p-cresol. *Int. J. Syst. Evol. Microbiol.* **65**, 4013–4018 (2015).
10. R. A. Wilkes, C. M. Mendonca, L. Aristilde, A cyclic metabolic network in *Pseudomonas protegens* Pf-5 prioritizes the Entner-Doudoroff pathway and exhibits substrate hierarchy during carbohydrate catabolism. *Appl. Environ. Microbiol.* **85**, e02084-18 (2019).
11. P. I. Nikel, *et al.*, *Pseudomonas putida* KT2440 metabolizes glucose through a cycle formed by enzymes of the Entner-Doudoroff, Embden-Meyerhof-Parnas, and Pentose Phosphate pathways. *J. Biol. Chem.* **290**, 1–29 (2015).
12. W. D. Hollinshead, *et al.*, Examining *Escherichia coli* glycolytic pathways, catabolite repression, and metabolite channeling using  $\Delta\text{pfk}$  mutants. *Biotechnol. Biofuels* **9**, 212 (2016).
13. K. Salcedo-Vite, J.-C. Sigala, D. Segura, G. Gosset, A. Martinez, *Acinetobacter baylyi* ADP1 growth performance and lipid accumulation on different
