# Supplementary material for: Analogous Metabolic Decoupling in Pseudomonas putida and Comamonas testosteroni Implies Energetic Bypass to Facilitate Gluconeogenic Growth
Source: PubMed Central journal article supplement (PMC8669468; doi:10.1128/mbio.03259-21), 2021-12-14
Supplement: mbio.03259-21-st002.pdf [file mbio.03259-21-st002.pdf]

**Table S2A.** Fold changes in protein abundances in succinate-grown relative to gluconate-grown *P. putida* KT2440. Values in bold represent *p* values considered significant after adjusting for the false discovery rate ( $q = 0.05$ ). Data were obtained from four biological replicates. Not found, NF; Not applicable, N/A.

| Reactions                                         | ORF number     | Protein name                                 | Protein abundance<br>Log <sub>2</sub> (FC) | p value         |
|---------------------------------------------------|----------------|----------------------------------------------|--------------------------------------------|-----------------|
| Succinate_EX -> Succinate                         | PP_1188        | Succinate transporter (DctA)                 | Succinate only                             | N/A             |
| <b>Gluconate_EX -&gt; gluconate</b>               | <b>PP_3417</b> | <b>Gluconate transporter (GntT)</b>          | <b>-3.140</b>                              | <b>0.0101</b>   |
| Gluconate -> 6-phosphogluconate                   | PP_3416        | Gluconokinase (GnuK)                         | Gluconate only                             | N/A             |
| Gluconate -> 2-Ketogluconate                      | PP_3383        | Gluconate 2-dehydrogenase (Gad)              | Gluconate only                             | N/A             |
| Gluconate -> 2-Ketogluconate                      | PP_3384        | Gluconate 2-dehydrogenase (Gad)              | NF                                         | N/A             |
| Gluconate -> 2-Ketogluconate                      | PP_3382        | Gluconate 2-dehydrogenase (Gad)              | NF                                         | N/A             |
| 2-ketogluconate_peri -> 2-ketogluconate           | PP_3377        | 2-ketogluconate transporter, putative (KguT) | Gluconate only                             | N/A             |
| 2-Ketogluconate -> 2-ketogluconate-6-phosphate    | PP_3378        | 2-Ketogluconate kinase (KguK)                | Gluconate only                             | N/A             |
| 2-ketogluconate-6-phosphate -> 6-phosphogluconate | PP_3376        | 2-Ketogluconate-6-phosphate reductase (KguD) | NF                                         | N/A             |
| Pyruvate -> Acetyl-CoA + CO <sub>2</sub>          | PP_0339        | Pyruvate dehydrogenase (AceE)                | 0.304                                      | 0.339           |
| Acetyl-CoA + Oxaloacetate -> Citrate + CoA        | PP_2335        | Citrate synthase (PrpC)                      | -0.343                                     | 0.334           |
| acetyl-CoA + oxaloacetate -> Citrate + CoA        | PP_4194        | Citrate synthase (GltA)                      | 0.00                                       | 0.399           |
| citrate -> isocitrate                             | PP_2339        | Aconitate hydratase B (aconitase) (AcnB)     | -0.099                                     | 0.392           |
| isocitrate -> α-ketoglutarate + CO <sub>2</sub>   | PP_4011        | Isocitrate dehydrogenase [NADP] (Icd)        | NF                                         | N/A             |
| isocitrate -> α-ketoglutarate + CO <sub>2</sub>   | PP_4012        | Isocitrate dehydrogenase [NADP] (Idh)        | 0.279                                      | 0.377           |
| α-Ketoglutarate -> Succinyl-CoA + CO <sub>2</sub> | PP_4189        | 2-oxoglutarate dehydrogenase (SucA)          | 0.251                                      | 0.331           |
| α-Ketoglutarate -> Succinyl-CoA + CO <sub>2</sub> | PP_4188        | 2-oxoglutarate dehydrogenase (SucB)          | -0.058                                     | 0.396           |
| Succinyl-CoA -> Succinate                         | PP_4186        | Succinyl-coenzymeA synthase (SucC)           | 0.194                                      | 0.371           |
| Succinyl-CoA -> Succinate                         | PP_4185        | Succinyl-coenzymeA synthase (SucD)           | -0.187                                     | 0.363           |
| <b>Succinate &lt;-&gt; Fumarate</b>               | <b>PP_4191</b> | <b>Succinate dehydrogenase (SdhA)</b>        | <b>0.978</b>                               | <b>0.0005</b>   |
| Succinate <-> Fumarate                            | PP_4190        | Succinate dehydrogenase (SdhB)               | 0.953                                      | 0.235           |
| Fumarate <-> malate                               | PP_0897        | Fumarate hydratase (FumA)                    | 0.285                                      | 0.328           |
| Malate + NAD+ <-> NADH + Oxaloacetate             | PP_0654        | Malate dehydrogenase (Mdh)                   | NF                                         | N/A             |
| Malate + a quinone = a quinol + Oxaloacetate      | PP_0751        | malate:quinone oxidoreductase (Mqo)          | -0.952                                     | 0.031           |
| Isocitrate -> Succinate + Glyoxylate              | PP_4116        | Isocitrate lyase (AceA)                      | -1.661                                     | 0.271           |
| Acetyl-CoA + Glyoxylate -> Malate                 | PP_0356        | Malate synthase (GlcB)                       | -0.458                                     | 0.253           |
| <b>Pyruvate + CO<sub>2</sub> -&gt; OAA</b>        | <b>PP_5346</b> | <b>Pyruvate carboxylase (PycB)</b>           | <b>-2.973</b>                              | <b>4.30E-06</b> |

|                                                                                                         |                |                                                                  |               |                 |
|---------------------------------------------------------------------------------------------------------|----------------|------------------------------------------------------------------|---------------|-----------------|
| Oxaloacetate -> CO <sub>2</sub> + Pyruvate                                                              | PP_1389        | Oxaloacetate decarboxylase (Odx)                                 | 0.338         | 0.357           |
| GTP + Oxaloacetate -                                                                                    | NF             | PEP carboxykinase (Pck)                                          | NF            | N/A             |
| > CO <sub>2</sub> + GDP + Phosphoenolpyruvate                                                           |                |                                                                  |               |                 |
| Phosphoenolpyruvate -> Oxaloacetate                                                                     | PP_1505        | PEP carboxylase (Ppc)                                            | NF            | N/A             |
| Malate <-> Pyruvate + CO <sub>2</sub>                                                                   | PP_5085        | Malic enzyme (MaeB)                                              | 0.045         | 0.398           |
| Pyruvate -> Phosphoenolpyruvate                                                                         | PP_2082        | Phosphoenolpyruvate synthase (PpsA)                              | -0.390        | 0.304           |
| Phosphoenolpyruvate -> Pyruvate                                                                         | PP_1362        | Pyruvate kinase (PykA)                                           | -0.095        | 0.395           |
| Phosphoenolpyruvate <-> 2-Phosphoglycerate                                                              | PP_1612        | Enolase (Eno)                                                    | 0.239         | 0.370           |
| 2-Phosphoglycerate <-> 3-Phosphoglycerate                                                               | PP_5056        | 2,3-bisphosphoglycerate-dependent phosphoglycerate mutase (GpmI) | 0.430         | 0.317           |
| 3-phosphoglycerate <-> 1,3-Bisphosphoglycerate                                                          | PP_4963        | Phosphoglycerate kinase (Pgc)                                    | 0.053         | 0.396           |
| <b>1,3-Bisphosphoglycerate + NADH -&gt; Glyceraldehyde 3-phosphate + NAD+</b>                           | <b>PP_1009</b> | <b>Glyceraldehyde-3-phosphate dehydrogenase (GapA)</b>           | <b>-4.403</b> | <b>6.09E-31</b> |
| 1,3-Bisphosphoglycerate + NADH -> Glyceraldehyde 3-phosphate + NAD+                                     | PP_2149        | Glyceraldehyde-3-phosphate dehydrogenase (GapB)                  | 0.615         | 0.203           |
| Glyceraldehyde 3-phosphate <-> Dihydroxyacetone phosphate                                               | PP_4715        | Triosephosphate isomerase (TpiA)                                 | 0.032         | 0.398           |
| Fructose 1,6-bisphosphate <-> Glyceraldehyde 3-phosphate + Dihydroxyacetone phosphate                   | PP_4960        | Fructose-1,6-bisphosphate aldolase (Fba)                         | 0.155         | 0.386           |
| Fructose 1,6-bisphosphate -> Fructose 6-phosphate                                                       | PP_5040        | Fructose-1,6-bisphosphatase (Fbp)                                | 0.591         | 0.331           |
| Glucose 6-phosphate <-> Fructose 6-phosphate                                                            | PP_1808        | Glucose-6-phosphate isomerase (Pgi1)                             | -0.157        | 0.394           |
| Glucose 6-phosphate <-> Fructose 6-phosphate                                                            | PP_4701        | Glucose-6-phosphate isomerase (Pgi2)                             | NF            | N/A             |
| <b>Glucose-6-phosphate -&gt; 6-Phosphoglucono-1,5-lactone</b>                                           | <b>PP_1022</b> | <b>Glucose-6-phosphate 1-dehydrogenase (ZwfA)</b>                | <b>-3.607</b> | <b>2.78E-10</b> |
| <b>6-Phosphoglucono-1,5-lactone -&gt; 6-Phosphogluconate</b>                                            | <b>PP_1023</b> | <b>6-phosphogluconolactonase (Pgl)</b>                           | <b>-4.126</b> | <b>7.30E-20</b> |
| 6-Phosphogluconate -> Ribulose 5-phosphate + CO <sub>2</sub>                                            | PP_4043        | Putative 6-phosphogluconate dehydrogenase (GntZ)                 | -0.255        | 0.382           |
| Ribulose 5-phosphate <-> Xylulose 5-phosphate                                                           | PP_0415        | Ribulose-phosphate 3-epimerase (Rpe)                             | Succ only     | 0.399           |
| Ribulose 5-phosphate <-> Ribose 5-phosphate                                                             | PP_5150        | Ribose-5-phosphate isomerase A (Rpi)                             | 0.321         | 0.353           |
| Sedoheptulose 7-phosphate + Glyceraldehyde 3-phosphate <-> Ribose 5-phosphate + Xylulose 5-phosphate    | PP_4965        | transketolase (Tkt)                                              | 0.087         | 0.39            |
| Erythrose 4-phosphate + Xylulose 5-phosphate <-> Fructose 6-phosphate + Glyceraldehyde 3-phosphate      | PP_4966        | transketolase (Tkt)                                              | 0.087         | 0.390           |
| Glyceraldehyde 3-phosphate + Sedoheptulose 7-phosphate <-> Fructose 6-phosphate + Erythrose 4-phosphate | PP_2168        | Transaldolase (Tal)                                              | -0.801        | 0.158           |
| 6-phosphogluconate -> 2-Dehydro-3-deoxy-6-phosphogluconate                                              | PP_1010        | 6-phosphogluconate dehydratase (Edd)                             | -2.949        | <b>4.05E-09</b> |
| 2-Dehydro-3-deoxy-6-phosphogluconate -> Glyceraldehyde 3-phosphate + Pyruvate                           | PP_1024        | 2-dehydro-3-deoxy-phosphogluconate aldolase (Eda)                | -3.463        | <b>2.37E-07</b> |

**Table S2B.** Fold changes in protein abundances in succinate-grown relative to gluconate-grown *C. testosteroni* KF-1. Values in bold represent *p* values considered significant after adjusting for the false discovery rate ( $q = 0.05$ ). Data were obtained from four biological replicates. Not found, NF; Not applicable, N/A.

| Reactions                                                  | ORF number            | Protein name                                   | Protein abundance<br>Log <sub>2</sub> (FC) | p-value         |
|------------------------------------------------------------|-----------------------|------------------------------------------------|--------------------------------------------|-----------------|
| Succinate_EX -> Succinate                                  | WP_042437594.1        | Succinate transporter (DctA)                   | Succinate only                             | N/A             |
| Gluconate_EX -> gluconate                                  | WP_003060256.1        | Gluconate transporter (GntT)                   | NF                                         | N/A             |
| Gluconate -> 6-phosphogluconate                            | WP_003053074.1        | Gluconokinase (GnuK)                           | NF                                         | N/A             |
| Gluconate -> 2-Ketogluconate                               | WP_003052499.1        | Gluconate 2-dehydrogenase (Gad)                | NF                                         | N/A             |
| 2-ketogluconate_peri -> 2-ketogluconate                    | WP_003073082.1        | 2-ketogluconate transporter, putative (KguT)   | Gluconate only                             | N/A             |
| 2-Ketogluconate -> 2-ketogluconate-6-phosphate             | NF                    | 2-Ketogluconate kinase (KguK)                  | NF                                         | N/A             |
| 2-ketogluconate-6-phosphate -> 6-phosphogluconate          | NF                    | 2-Ketogluconate -6-phosphate reductase (KguD)  | NF                                         | N/A             |
| Pyruvate ->Acetyl-CoA + CO <sub>2</sub>                    | WP_003079261.1        | Pyruvate dehydrogenase (PDH)                   | 0.021285179                                | 0.398           |
| acetyl-CoA + oxaloacetate -> Citrate + CoA                 | WP_003063579.1        | Citrate synthase (GltA)                        | 0.02                                       | 0.398           |
| <b>citrate -&gt; isocitrate</b>                            | <b>WP_003077707.1</b> | <b>Aconitate hydratase B (aconitase) (Acn)</b> | <b>-1.32148789</b>                         | <b>4.90E-04</b> |
| citrate -> isocitrate                                      | WP_003074861.1        | Aconitate hydratase B (aconitase) (AcnB)       | 0.742778393                                | 0.016           |
| isocitrate -> α-ketoglutarate + CO <sub>2</sub>            | WP_003075787.1        | Isocitrate dehydrogenase [NADP] (IDH1)         | -0.05327177                                | 0.396           |
| isocitrate -> α-ketoglutarate + CO <sub>2</sub>            | WP_003075779.1        | Isocitrate dehydrogenase [NADP] (IDH2)         | -0.47473197                                | 0.153           |
| α-Ketoglutarate -> Succinyl-CoA + CO <sub>2</sub>          | WP_003055529.1        | 2-oxoglutarate dehydrogenase (SucA)            | -0.72855508                                | 0.038           |
| <b>α-Ketoglutarate -&gt; Succinyl-CoA + CO<sub>2</sub></b> | <b>WP_003079542.1</b> | <b>2-oxoglutarate dehydrogenase (Suc)</b>      | <b>-0.89460046</b>                         | <b>0.024</b>    |
| Succinyl-CoA -> Succinate                                  | WP_003060063.1        | Succinyl-coenzymeA synthase (SucC)             | 0.792938396                                | 0.004           |
| Succinyl-CoA -> Succinate                                  | WP_003060065.1        | Succinyl-coenzymeA synthase (SucD)             | 0.585472077                                | 0.176           |
| Succinate <-> Fumarate                                     | WP_003063573.1        | Succinate dehydrogenase (SdhA)                 | 0.624324295                                | 0.218           |
| Succinate <-> Fumarate                                     | WP_042438405.1        | Succinate dehydrogenase (SdhB)                 | 0.540072365                                | 0.193           |
| Succinate <-> Fumarate                                     | WP_003074853.1        | Succinate dehydrogenase (SdhC)                 | 0.028758807                                | 0.399           |
| Fumarate <-> malate                                        | WP_003061052.1        | Fumarate hydratase (FH1)                       | 0.927807457                                | 0.054           |
| Fumarate <-> malate                                        | WP_003078203.1        | Fumarate hydratase (FH2)                       | -0.485187783                               | 0.207           |
| Malate + NAD+ <-> NADH + Oxaloacetate                      | WP_003053219.1        | Malate dehydrogenase (Mdh)                     | 0.272711414                                | 0.308           |
| Malate + a quinone = a quinol + Oxaloacetate               | WP_003078637.1        | malate:quinone oxidoreductase (Mqo)            | Succinate only                             | N/A             |
| Isocitrate -> Succinate + Glyoxylate                       | WP_003053566.1        | Isocitrate lyase (AceA)                        | Gluconate only                             | N/A             |
| Acetyl-CoA + Glyoxylate -> Malate                          | WP_003080923.1        | Malate synthase (MS)                           | -0.20031641                                | .388            |
| Pyruvate + CO <sub>2</sub> -> OAA                          |                       | Pyruvate carboxylase (PycB)                    | NF                                         | N/A             |

|                                                                                                         |                       |                                                                 |                |                 |
|---------------------------------------------------------------------------------------------------------|-----------------------|-----------------------------------------------------------------|----------------|-----------------|
| Oxaloacetate -> CO <sub>2</sub> + Pyruvate                                                              | WP_003054191.1        | Oxaloacetate decarboxylase (Odx)                                | Gluconate only | N/A             |
| <b>GTP + Oxaloacetate -&gt; CO<sub>2</sub> + GDP + Phosphoenolpyruvate</b>                              | <b>WP_003072005.1</b> | <b>PEP carboxykinase (Pck)</b>                                  | <b>4.72</b>    | <b>1.59E-14</b> |
| Phosphoenolpyruvate -> Oxaloacetate                                                                     | WP_003078754.1        | PEP carboxylase (PEPcx)                                         | Gluconate only | N/A             |
| Malate <-> Pyruvate + CO <sub>2</sub>                                                                   | WP_003072131.1        | Malic enzyme (ME1)                                              | succ only      | N/A             |
| Malate <-> Pyruvate + CO <sub>2</sub>                                                                   | WP_003074720.1        | Malic enzyme (ME2)                                              | 0.219          | 0.363           |
| Pyruvate -> Phosphoenolpyruvate                                                                         | WP_003076285.1        | Phosphoenolpyruvate synthase (PEPs)                             | 0.890          | 0.033           |
| <b>Phosphoenolpyruvate -&gt; Pyruvate</b>                                                               | <b>WP_034347964.1</b> | <b>Pyruvate kinase (PK)</b>                                     | <b>-1.17</b>   | <b>0.001</b>    |
| Phosphoenolpyruvate <-> 2-Phosphoglycerate                                                              | WP_003057720.1        | Enolase (Eno)                                                   | 0.731          | 0.136           |
| 2-Phosphoglycerate <-> 3-Phosphoglycerate                                                               | WP_003072651.1        | 2,3-bisphosphoglycerate-dependent phosphoglycerate mutase (Gpm) | 0.619          | 0.168           |
| 3-phosphoglycerate <-> 1,3-Bisphosphoglycerate                                                          | WP_003072267.1        | Phosphoglycerate kinase (Pkg)                                   | 1.696          | 0.011           |
| 1,3-Bisphosphoglycerate + NADH -> Glyceraldehyde 3-phosphate + NAD+                                     | WP_003060372.1        | Glyceraldehyde-3-phosphate dehydrogenase (Gap)                  | 0.376          | 0.279           |
| Glyceraldehyde 3-phosphate <-> Dihydroxyacetone phosphate                                               | WP_003057838.1        | Triosephosphate isomerase (TpiA)                                | NF             | N/A             |
| Fructose 1,6-bisphosphate <-> Glyceraldehyde 3-phosphate + Dihydroxyacetone phosphate                   | WP_003072472.1        | Fructose-1,6-bisphosphate aldolase (Fba)                        | 0.479          | 0.136           |
| Fructose 1,6-bisphosphate -> Fructose 6-phosphate                                                       | WP_003061245.1        | Fructose-1,6-bisphosphatase (Fbp)                               | 0.262          | 0.374           |
| Glucose 6-phosphate <-> Fructose 6-phosphate                                                            | WP_029158506.1        | Glucose-6-phosphate isomerase (Pgi1)                            | NF             | N/A             |
| 6-Phosphogluconate -> Ribulose 5-phosphate + CO <sub>2</sub>                                            | WP_003050579.1        | Putative 6-phosphogluconate dehydrogenase (GntZ)                | NF             | N/A             |
| Ribulose 5-phosphate <-> Xylulose 5-phosphate                                                           | WP_003076181.1        | Ribulose-phosphate 3-epimerase (Rpe)                            | NF             | N/A             |
| Ribulose 5-phosphate <-> Ribose 5-phosphate                                                             | WP_012838302.1        | Ribose-5-phosphate isomerase A (RpiA)                           | 0.349          | 0.349           |
| Sedoheptulose 7-phosphate + Glyceraldehyde 3-phosphate <-> Ribose 5-phosphate + Xylulose 5-phosphate    | WP_003072441.1        | transketolase (Tkt)                                             | 0.081          | 0.396           |
| Erythrose 4-phosphate + Xylulose 5-phosphate <-> Fructose 6-phosphate + Glyceraldehyde 3-phosphate      | WP_003072441.1        | transketolase (Tkt)                                             | 0.081          | 0.396           |
| Glyceraldehyde 3-phosphate + Sedoheptulose 7-phosphate <-> Fructose 6-phosphate + Erythrose 4-phosphate | WP_003058705.1        | Transaldolase (Tal)                                             | NF             | N/A             |
| 6-phosphogluconate -> 2-Dehydro-3-deoxy-6-phosphogluconate                                              | WP_003074773.1        | 6-phosphogluconate dehydratase (Edd)                            | Gluconate only | N/A             |
| 2-Dehydro-3-deoxy-6-phosphogluconate -> Glyceraldehyde 3-phosphate + Pyruvate                           | WP_003074771.1        | 2-dehydro-3-deoxy-phosphogluconate aldolase (Eda)               | Gluconate only | N/A             |
