# Supplementary material for: Analogous Metabolic Decoupling in Pseudomonas putida and Comamonas testosteroni Implies Energetic Bypass to Facilitate Gluconeogenic Growth
Source: PubMed Central journal article supplement (PMC8669468; doi:10.1128/mbio.03259-21), 2021-12-14
Supplement: mbio.03259-21-st003.pdf [file mbio.03259-21-st003.pdf]

**Table S3.** Physiological characteristics of *P. putida* KT2440, *C. testosteroni* KF-1, and *C. testosteroni* T-2 grown on succinate or gluconate. NF indicates that the metabolites were not quantified in the extracellular medium. Data are expressed as mean  $\pm$  the standard deviation of three biological replicates.

\*Biomass yield accounted for 2-ketogluconate as a substrate in addition to gluconate.

\*\*Data in parentheses represent consumption rate for 2-ketogluconate.

|                                                                            | <i>P. putida</i> KT2440              | <i>C. testosteroni</i> KF-1       | <i>C. testosteroni</i> T-2        |
|----------------------------------------------------------------------------|--------------------------------------|-----------------------------------|-----------------------------------|
| Succinate                                                                  |                                      |                                   |                                   |
| Growth rate (h <sup>-1</sup> )                                             | 0.98 $\pm$ 0.05                      | 0.67 $\pm$ 0.05                   | 0.62 $\pm$ 0.04                   |
| Biomass yield<br>(g <sub>CDW</sub> g <sub>Substrate</sub> <sup>-1</sup> )  | 0.53 $\pm$ 0.07                      | 0.40 $\pm$ 0.06                   | 0.28 $\pm$ 0.08                   |
| Consumption rate<br>(mmol g <sub>CDW</sub> <sup>-1</sup> h <sup>-1</sup> ) | 16.0 $\pm$ 2.0                       | 12.2 $\pm$ 1.7                    | 12.7 $\pm$ 1.3                    |
| Secretions<br>(mmol g <sub>CDW</sub> <sup>-1</sup> h <sup>-1</sup> )       |                                      |                                   |                                   |
| $\alpha$ -Ketoglutarate                                                    | 0.16 $\pm$ 0.04                      | 0.027 $\pm$ 0.003                 | 3.5 $\pm$ 2.4 x10 <sup>-3</sup>   |
| Citrate                                                                    | 1.4 $\pm$ 0.5 x10 <sup>-3</sup>      | NF                                | NF                                |
| Fumarate                                                                   | 0.48 $\pm$ 0.07                      | NF                                | NF                                |
| Malate                                                                     | 0.71 $\pm$ 0.35                      | NF                                | NF                                |
| Pyruvate                                                                   | 0.10 $\pm$ 0.04                      | NF                                | NF                                |
| Aspartate                                                                  | 0.015 $\pm$ 0.002                    | NF                                | NF                                |
| Glutamate                                                                  | 0.16 $\pm$ 0.03                      | 5.6 $\pm$ 0.7 x10 <sup>-3</sup>   | 0.12 $\pm$ 0.05 x10 <sup>-3</sup> |
| Gluconate                                                                  |                                      |                                   |                                   |
| Growth rate (h <sup>-1</sup> )                                             | 0.64 $\pm$ 0.05                      | 0.38 $\pm$ 0.01                   | 0.53 $\pm$ 0.01                   |
| Biomass yield<br>(g <sub>CDW</sub> g <sub>Substrate</sub> <sup>-1</sup> )  | 0.23 $\pm$ 0.01*                     | 0.14 $\pm$ 0.03                   | 0.21 $\pm$ 0.02                   |
| Consumption rate<br>(mmol g <sub>CDW</sub> <sup>-1</sup> h <sup>-1</sup> ) | 15.5 $\pm$ 1.8<br>(12.6 $\pm$ 2.6)** | 10.47 $\pm$ 3.35                  | 14.33 $\pm$ 3.97                  |
| Secretions<br>(mmol g <sub>CDW</sub> <sup>-1</sup> h <sup>-1</sup> )       |                                      |                                   |                                   |
| 2-Ketogluconate                                                            | 8.8 $\pm$ 1.1                        | 3.4 $\pm$ 0.4                     | 6.3 $\pm$ 1.2                     |
| Succinate                                                                  | 5.3 $\pm$ 3.9 x10 <sup>-3</sup>      | 1.7 $\pm$ 0.3 x10 <sup>-3</sup>   | 8.2 $\pm$ 1.0 x10 <sup>-3</sup>   |
| 3-Phosphoglycerate                                                         | 0.012 $\pm$ 0.003                    | 0.76 $\pm$ 0.50 x10 <sup>-3</sup> | 1.1 $\pm$ 0.9 x10 <sup>-3</sup>   |
| 6-Phosphogluconate                                                         | 1.7 $\pm$ 0.4 x10 <sup>-3</sup>      | 1.5 $\pm$ 0.4 x10 <sup>-3</sup>   | 1.8 $\pm$ 0.7 x10 <sup>-3</sup>   |
| Pyruvate                                                                   | NF                                   | 3.3 $\pm$ 0.5 x10 <sup>-3</sup>   | 2.6 $\pm$ 0.6 x10 <sup>-3</sup>   |
| Glutamate                                                                  | 0.056 $\pm$ 0.024                    | 4.2 $\pm$ 1.6 x10 <sup>-3</sup>   | 0.047 $\pm$ 0.008                 |
| Aspartate                                                                  | NF                                   | NF                                | 4.9 $\pm$ 0.4 x10 <sup>-3</sup>   |
